# Supplementary material for: First-in-Class, First-in-Human Study Evaluating LV305, a Dendritic-Cell Tropic Lentiviral Vector, in Sarcoma and Other Solid Tumors Expressing NY-ESO-1
Source: Oxford University Press journal article supplement (doi:10.1158/1078-0432.ccr-19-1025), 2019-06-21

**Supplemental Figure 1. Progression-free and Overall Survival in Patients with Sarcoma (N = 24).** Kaplan-Meier analysis of PFS (Panel A, Panel B) and OS (Panel C, Panel D) are shown for all patients with sarcoma (Panel A, Panel C) and by sarcoma tumor subtype (Panel B, Panel D), respectively.


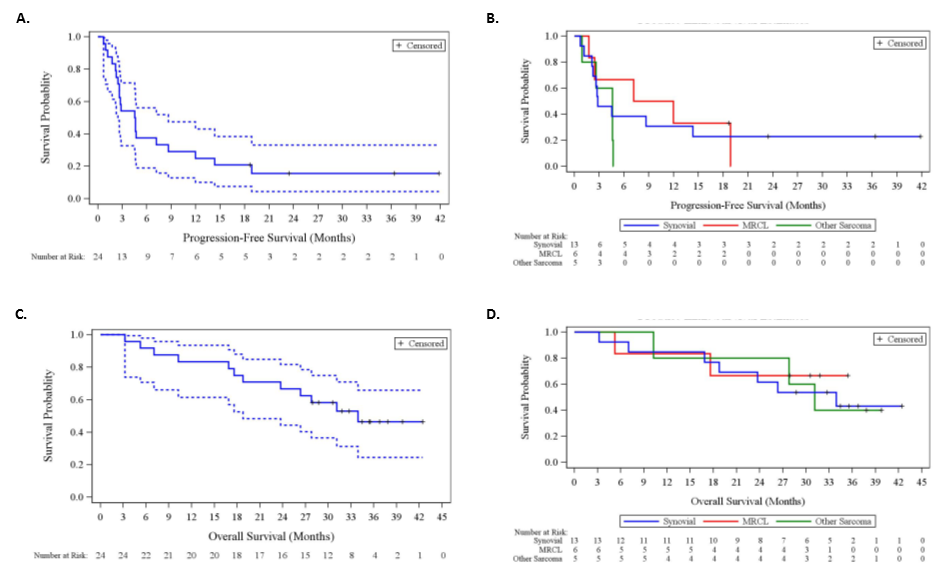

Supplement: 10780432ccr191025-sup-219692_2_supp_5588149_pt3wlr.docx [file 10780432ccr191025-sup-219692_2_supp_5588149_pt3wlr.docx]
